# Supplementary material for: Combinatorial Drug Treatments Reveal Promising Anticytomegaloviral Profiles for Clinically Relevant Pharmaceutical Kinase Inhibitors (PKIs)
Source: PubMed Central journal article supplement (PMC7826512; doi:10.3390/ijms22020575), 2021-01-08
Supplement: ijms-22-00575-s001.pdf [file ijms-22-00575-s001.pdf]

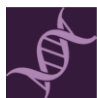

# Supplementary Materials

*Article*

## **Combinatorial drug treatments reveal promising anticytomegaloviral profiles for clinically relevant pharmaceutical kinase inhibitors (PKIs)**

**Markus Wild<sup>1</sup>, Jintawee Kicuntod<sup>1</sup>, Lisa Seyler<sup>2</sup>, Christina Wangen<sup>1</sup>, Luca D. Bertzbach<sup>3</sup>, Andelé M. Conradie<sup>3</sup>, Benedikt B. Kaufer<sup>3</sup>, Sabrina Wagner<sup>1</sup>, Detlef Michel<sup>4</sup>, Jan Eickhoff<sup>5</sup>, Svetlana B. Tsogoeva<sup>6</sup>, Tobias Bäuerle<sup>2</sup>, Friedrich Hahn<sup>1</sup>, Manfred Marschall<sup>1,\*</sup>**

<sup>1</sup> Institute for Clinical and Molecular Virology, Friedrich-Alexander University of Erlangen-Nürnberg (FAU), Schlossgarten 4, 91054 Erlangen, Germany; markus.wild@uk-erlangen.de, jintawee.kicuntod@extern.uk-erlangen.de, christina.wangen@uk-erlangen.de, sabrina.wagner@uk-erlangen.de, friedrich.hahn@uk-erlangen.de, manfred.marschall@fau.de

<sup>2</sup> Institute of Radiology, University Medical Center Erlangen, FAU, Palmsanlage 5, 91054 Erlangen, Germany; lisa.seyler@uk-erlangen.de, tobias.baerle@uk-erlangen.de

<sup>3</sup> Institute of Virology, Freie Universität Berlin, Robert-von-Ostertag-Straße 7-13, 14163 Berlin, Germany; luca.bertzbach@fu-berlin.de; andele.conradie@fu-berlin.de; benedikt.kaufer@fu-berlin.de

<sup>4</sup> Institute for Virology, Ulm University Medical Center, Albert-Einstein-Allee 11, Ulm, Germany; detlef.michel@uniklinik-ulm.de

<sup>5</sup> Lead Discovery Center GmbH, Otto-Hahn-Str. 15, 44227 Dortmund, Germany; eickhoff@lead-discovery.de

<sup>6</sup> Institute of Organic Chemistry I, FAU, Nikolaus-Fiebiger-Straße 10, 91058 Erlangen Germany; svetlana.tsogoeva@fau.de

\* Correspondence: manfred.marschall@fau.de; Tel.: ++49 9131 8526089

Received: date; Accepted: date; Published: date

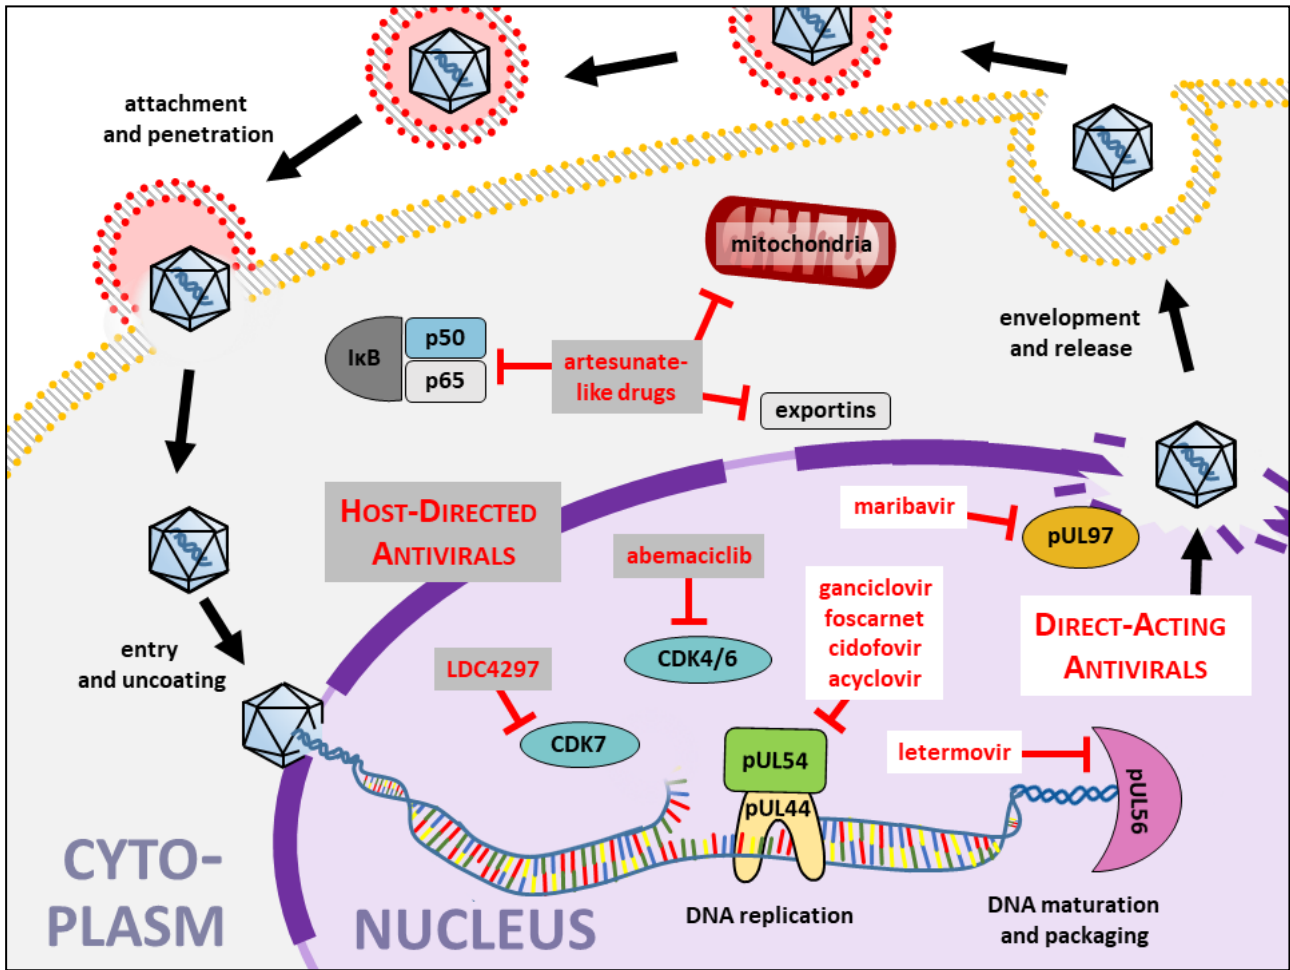

**Figure S1.** Scheme of the HCMV replication cycle illustrating the distinct modes of action of approved direct-acting antivirals (DAAs; i.e. ganciclovir, foscarnet, cidofovir, acyclovir, letermovir), developmental DAA (maribavir) and host-directed antivirals (HDAs; i.e. artesunate-like drugs, abemaciclib, LDC4297).
